# Supplementary material for: Radiolarian assemblages related to the ocean–ice interaction around the East Antarctic coast
Source: Copernicus journal article supplement (doi:10.5194/jm-43-37-2024), 2024-01-24
Supplement: Supplementary file 1 [file jm-43-37-2024-supplement.zip]

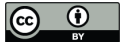

*Supplement of*

## **Radiolarian assemblages related to the ocean–ice interaction around the East Antarctic coast**

**Mutsumi Iizuka et al.**

*Correspondence to:* Mutsumi Iizuka ([m.iizuka@aist.go.jp](mailto:m.iizuka@aist.go.jp))

- [jm-43-37-2024-supplement-title-page.pdf](#)
- [JARE61-CTD-data.xlsx](#)
- [Planktonnet.xlsx](#)
- [Surface Sediment.xlsx](#)

The copyright of individual parts of the supplement might differ from the article licence.
